# Supplementary material for: Prevalence and Risk Factors of Asthma in Children and Adolescents in Rabigh, Western Saudi Arabia
Source: MDPI journal article supplement (doi:10.3390/children10020247), 2023-01-30
Supplement: s1 [file s1]

**Table S1. Significant risk factors in univariate analysis which were associated with any wheeze in children and adolescents of Rabigh's community**

| Variable                                          | Any wheeze (n=82) |       | No wheeze (n=267) |       | Odds ratio (95% CI) | X <sup>2</sup> | P       |
|---------------------------------------------------|-------------------|-------|-------------------|-------|---------------------|----------------|---------|
|                                                   | N                 | %     | N                 | %     |                     |                |         |
| <b>Residence near to main roads</b>               | 31                | 37.80 | 64                | 23.97 | 1.93 (1.14-3.27)    | 6.6            | 0.01    |
| <b>Atopy in the child</b>                         | 34                | 41.50 | 62                | 23.22 | 4.67 (2.76-7.88)    | 36.2           | <0.0001 |
| <b>Allergic rhinitis in the child</b>             | 43                | 52.43 | 43                | 16.10 | 5.74 (3.34-9.88)    | 44.6           | <0.0001 |
| <b>Allergic conjunctivitis in the child</b>       | 8                 | 9.76  | 8                 | 2.99  | 3.50 (1.27-9.64)    | 6.55           | 0.01    |
| <b>Drug allergy in the child</b>                  | 11                | 13.41 | 10                | 3.75  | 3.98 (1.63-9.75)    | 10.4           | 0.001   |
| <b>Atopy in the family</b>                        | 53                | 64.63 | 95                | 35.58 | 3.31 (1.97-5.55)    | 21.7           | <0.0001 |
| <b>Atopy in the mother</b>                        | 28                | 34.15 | 46                | 17.23 | 2.49 (1.43-4.34)    | 10.7           | 0.001   |
| <b>Atopy in the sister</b>                        | 24                | 29.27 | 34                | 12.73 | 2.84 (1.56-5.15)    | 12.4           | <0.0001 |
| <b>Allergic rhinitis in the family</b>            | 42                | 51.22 | 75                | 28.09 | 2.69 (1.62- 4.47)   | 15.1           | <0.0001 |
| <b>Eczema in the family</b>                       | 22                | 26.83 | 32                | 11.99 | 2.69 (1.46-4.97)    | 10.6           | 0.001   |
| <b>Allergic conjunctivitis in the family</b>      | 13                | 15.85 | 12                | 4.49  | 4.00 (1.75-9.17)    | 12.2           | <0.0001 |
| <b>Food allergy in the family</b>                 | 29                | 35.37 | 43                | 16.10 | 2.85 (1.63-4.98)    | 14.1           | <0.0001 |
| <b>Drug allergy in the family</b>                 | 7                 | 8.54  | 7                 | 2.62  | 3.47 (1.18-10.19)   | 5.7            | 0.02    |
| <b>Carpet/Mouquette in rooms</b>                  | 53                | 64.63 | 127               | 47.57 | 2.01 (1.21-3.36)    | 7.32           | 0.007   |
| <b>Exposure to passive smoking</b>                | 32                | 39.02 | 58                | 21.72 | 2.31 (1.36-3.92)    | 9.80           | 0.002   |
| <b>Exposure to burned coal/wood</b>               | 25                | 30.49 | 48                | 17.98 | 2.00 (1.14-3.52)    | 5.69           | 0.02    |
| <b>Exposure to perfumes/incense</b>               | 70                | 85.37 | 181               | 67.79 | 2.77 (1.43-5.38)    | 9.6            | 0.002   |
| <b>Exposure to dust</b>                           | 45                | 54.88 | 93                | 34.83 | 2.28 (1.38-3.76)    | 10.5           | 0.001   |
| <b>Viral respiratory infection induced-wheeze</b> | 25                | 30.49 | 14                | 5.24  | 7.93 (3.88-16.19)   | 40.2           | <0.0001 |
| <b>Fast food more than once/week</b>              | 39                | 47.56 | 76                | 28.46 | 2.28 (1.37-3.79)    | 10.4           | 0.001   |
| <b>Associated chronic illness/comorbidity</b>     | 20                | 24.39 | 33                | 12.36 | 2.29 (1.23-4.26)    | 7.05           | 0.008   |

**Table S2. Significant risk factors in univariate analysis which were associated with wheeze in the last 12 months in children and adolescents of Rabigh's community**

| Variable                                        | Wheeze in the last 12 months (n=52) |       | No wheeze in the last 12 months (n=297) |       | Odds ratio (95% CI) | X <sup>2</sup> | P       |
|-------------------------------------------------|-------------------------------------|-------|-----------------------------------------|-------|---------------------|----------------|---------|
|                                                 | N                                   | %     | N                                       | %     |                     |                |         |
| <b>Residence near to main roads</b>             | 23                                  | 44.23 | 72                                      | 24.24 | 2.48 (1.35-4.55)    | 8.9            | 0.003   |
| <b>Atopy in the child</b>                       | 34                                  | 65.38 | 75                                      | 25.25 | 6.09 (3.23-11.51)   | 36.3           | <0.0001 |
| <b>Allergic rhinitis in the child</b>           | 31                                  | 59.62 | 55                                      | 18.52 | 6.49 (3.47-12.15)   | 40.2           | <0.0001 |
| <b>Eczema in the child</b>                      | 11                                  | 21.15 | 22                                      | 7.41  | 3.35 (1.51- 7.42)   | 9.77           | 0.002   |
| <b>Allergic conjunctivitis in the child</b>     | 7                                   | 13.46 | 9                                       | 3.03  | 4.98 (1.77-14.03)   | 11.00          | 0.001   |
| <b>Drug allergy in the child</b>                | 11                                  | 21.15 | 10                                      | 3.37  | 7.70 (3.08-19.26)   | 24.8           | <0.0001 |
| <b>Atopy in the family</b>                      | 32                                  | 61.54 | 116                                     | 39.06 | 2.49 (1.36-4.57)    | 9.16           | 0.002   |
| <b>Atopy in the mother</b>                      | 18                                  | 34.62 | 56                                      | 18.86 | 2.28 (1.20-4.33)    | 6.58           | 0.01    |
| <b>Atopy in the brother</b>                     | 16                                  | 30.77 | 54                                      | 18.18 | 2.00 (1.04-3.86)    | 4.37           | 0.03    |
| <b>Atopy in the sister</b>                      | 16                                  | 30.77 | 42                                      | 14.14 | 2.69 (1.38-5.29)    | 8.83           | 0.003   |
| <b>Allergic rhinitis in the family</b>          | 27                                  | 51.92 | 90                                      | 30.30 | 2.48 (1.37-4.52)    | 9.28           | 0.002   |
| <b>Eczema in the family</b>                     | 14                                  | 26.92 | 40                                      | 13.47 | 2.37 (1.18-4.75)    | 6.13           | 0.01    |
| <b>Food allergy in the family</b>               | 17                                  | 32.69 | 55                                      | 18.52 | 2.14 (1.12-4.09)    | 5.40           | 0.02    |
| <b>Exposure to passive smoking</b>              | 21                                  | 40.38 | 69                                      | 23.23 | 2.24 (1.21-4.14)    | 6.80           | 0.009   |
| <b>Exposure to burned coal/wood</b>             | 17                                  | 32.69 | 56                                      | 18.86 | 2.09 (1.09-3.99)    | 5.12           | 0.02    |
| <b>Exposure to perfumes/incense</b>             | 45                                  | 86.54 | 206                                     | 69.36 | 2.84 (1.23-6.54)    | 6.47           | 0.01    |
| <b>Exposure to dust</b>                         | 35                                  | 67.31 | 103                                     | 34.68 | 3.88 (2.07-7.26)    | 19.70          | <0.0001 |
| <b>Exposure to viral respiratory infections</b> | 20                                  | 38.46 | 19                                      | 6.40  | 9.14 (4.42-18.91)   | 44.83          | <0.0001 |

**Table S3. Significant risk factors in univariate analysis which were associated with ever physician-diagnosed asthma in children and adolescents of Rabigh's community**

| Variable                                        | Physician-diagnosed asthma (n=110) |      | No Physician-diagnosed asthma (n=239) |      | Odds ratio (95% CI) | X <sup>2</sup> | P       |
|-------------------------------------------------|------------------------------------|------|---------------------------------------|------|---------------------|----------------|---------|
|                                                 | N                                  | %    | N                                     | %    |                     |                |         |
| <b>Residence near to main roads</b>             | 42                                 | 38.2 | 53                                    | 22.2 | 2.17 (1.32-3.54)    | 9.6            | 0.002   |
| <b>Atopy in the child</b>                       | 51                                 | 46.4 | 59                                    | 24.7 | 2.63 (1.64-4.25)    | 16.4           | <0.0001 |
| <b>Allergic rhinitis in the child</b>           | 42                                 | 38.2 | 44                                    | 18.4 | 2.73 (1.65-4.54)    | 16.3           | <0.0001 |
| <b>Allergic conjunctivitis in the child</b>     | 9                                  | 8.2  | 7                                     | 2.9  | 2.95 (1.07-8.15)    | 4.8            | 0.03    |
| <b>Drug allergy in the child</b>                | 13                                 | 11.8 | 8                                     | 3.3  | 3.83 (1.54-9.53)    | 9.6            | 0.004   |
| <b>Atopy in the family</b>                      | 68                                 | 61.8 | 80                                    | 33.5 | 3.22 (2.01-5.14)    | 24.8           | <0.0001 |
| <b>Atopy in the mother</b>                      | 34                                 | 30.9 | 40                                    | 16.7 | 2.23(1.31-3.77)     | 9.10           | 0.003   |
| <b>Atopy in the father</b>                      | 23                                 | 20.9 | 25                                    | 10.5 | 2.26 (1.22-4.20)    | 6.90           | 0.008   |
| <b>Atopy in the brother</b>                     | 31                                 | 28.2 | 39                                    | 16.3 | 2.01(1.17-3.45)     | 6.60           | 0.01    |
| <b>Atopy in the sister</b>                      | 27                                 | 24.5 | 31                                    | 13.0 | 2.18 (1.23-3.88)    | 7.30           | 0.007   |
| <b>Allergic rhinitis in the family</b>          | 53                                 | 48.2 | 64                                    | 26.8 | 2.54 (1.59- 4.07)   | 15.5           | <0.0001 |
| <b>Eczema in the family</b>                     | 35                                 | 31.8 | 19                                    | 7.9  | 5.40 (2.92-10.01)   | 32.8           | <0.0001 |
| <b>Allergic conjunctivitis in the family</b>    | 17                                 | 15.5 | 8                                     | 3.3  | 5.28 (2.20-12.65)   | 16.6           | <0.0001 |
| <b>Food allergy in the family</b>               | 34                                 | 30.9 | 38                                    | 15.9 | 2.37 (1.39- 4.03)   | 10.7           | 0.001   |
| <b>Exposure to passive smoking</b>              | 40                                 | 36.4 | 50                                    | 20.9 | 2.16 (1.31- 3.55)   | 9.90           | 0.002   |
| <b>Carpet/mouquette in home</b>                 | 71                                 | 64.5 | 111                                   | 46.4 | 2.09 (1.32- 3.35)   | 9.90           | 0.002   |
| <b>Exposure to burned coal/wood</b>             | 33                                 | 30.0 | 40                                    | 16.7 | 2.13 (1.25- 3.62)   | 7.70           | 0.006   |
| <b>Exposure to perfumes/incense</b>             | 102                                | 92.7 | 149                                   | 62.3 | 7.70 (3.58-16.56)   | 34.4           | <0.0001 |
| <b>Exposure to dust</b>                         | 67                                 | 60.9 | 71                                    | 29.7 | 3.69 (2.30- 5.92)   | 30.7           | <0.0001 |
| <b>Exposure to viral respiratory infections</b> | 32                                 | 29.1 | 7                                     | 2.9  | 13.60 (5.77- 32.04) | 52.4           | <0.0001 |
